# Supplementary material
Source: PubMed Central journal article supplement (PMC6437522)
Supplement: AAC.02205-18-s0001.pdf [file AAC.02205-18-s0001.pdf]

## Supplemental Material Table of Contents

|                                                                                                                                |    |
|--------------------------------------------------------------------------------------------------------------------------------|----|
| <b>FIG S1:</b> Nucleotide sequences of the pGT6a-cons replicon.....                                                            | 2  |
| <b>TABLE S1.</b> HCV GT-6 NS3, NS5A and NS5B primers to amplify and sequence patient-derived NS3, NS5A and NS5B coding regions | 8  |
| <b>TABLE S2.</b> USHCVDB HCV GT-6 sequences used in baseline polymorphism analyses                                             | 12 |
| <b>TABLE S3.</b> Source and HCV GT-6 subtypes of patient-derived samples                                                       | 15 |
| <b>TABLE S4.</b> Prevalence of HCV GT-6 subtypes by NS3 polymorphisms and country                                              | 17 |
| <b>TABLE S5.</b> Susceptibility of HCV GT-6 NS3 polymorphisms associated with drug resistance                                  | 20 |
| <b>TABLE S6.</b> Prevalence of HCV GT-6 subtypes by NS5B polymorphisms and country                                             | 22 |
| <b>TABLE S7.</b> Susceptibility of HCV GT-6 NS5B polymorphisms associated with drug resistance                                 | 25 |

HCV GT-6a-consensus 5' - untranslated region (5'-UTR) and the first 48 nucleotides of core:

GCCAGCCCCTTAACGGGGCGACTCCGCCATTATCACTCCCCTGTGAGGAACTACTGTCTT  
CACGCAGAAAGCGTCTAGCCATGGCGTTAGTATGAGTGTCGTACAGCCTCCAGGCCCCCCC  
CTCCCGGGAGAGCCATAGTGGTCTGCGGAACCGGTGAGTACACCGGAATTGCCAGGATGA  
CCGGGTCCTTTCCATTGGATCAAACCCGCTCAATGCCTGGAGATTTGGGCGTGCCCCCGCA  
AGACTGCTAGCCGAGTAGCGTTGGGTTGCGAAAGGCCTTGTGGTACTGCCTGATAGGGTGC  
TTGCGAGTGCCCCGGGAGGTCTCGTAGACCGTGCATCATGAGCACACTTCCAAAACCCCAA  
AGAAAAACCA

HCV GT-6a consensus sub-genomic sequence (NS3-NS5B):

GCTCCCATCACCGCGTATGCGCAGCAGACGAGGGGCCTAGTCGGCACCATTGTGACCAGCC  
TAACCGGGCGTGACAAAAATGAGGTCGAAGGGGAGGTACAGGTGGTCTCCACGGCTACCC  
AATCCTTCCTGGCGACCTCCATTAACGGTGTTCATGTGGACTGTTTATCATGGGGCCGGTTCA  
AAGACTCTCGCTGGACCGAAAGGACCAGTGTGTCAAATGTACACCAATGTGGACAAGGAC  
CTAGTAGGATGGCCATCTCCCCGGGAGCAAGGTCGCTCACCCCATGTACTTGTGGCTCTA  
GTGACCTCTATCTGGTCACGAGGGAGGCCGACGTTATCCCCGCAAGGCGCAGGGGTGACA  
ACCGTGCTGCCCTCCTCTCTCCTAGGCCATAAGCACCTTGAAAGGCTCCTCGGGAGGCC  
CATTATGTGTCCCTCGGGGCACGTTGTGGGACTCTTCCGAGCTGCCGTATGCACAAGGGGT  
GTAGCAAATCCTTAGATTTTATCCAGTGGAAAACATGGAGACGACTATGCGCTCTCCCT  
CATTACAGACAACCTCCACGCCGCCTGCGGTGCCCCAGACCTATCAGGTAGGGTATCTGCA  
CGCACCAACAGGCAGCGGAAAGAGCACCCGTGTTCCGGCGGCGTACGCTAGCCAGGGCTA  
CAAGGTGTTGGTCTTGAACCCATCGGTGGCGGCAACGCTTAGCTTTGGCTCTTATATGAGGC

AAGCTTACGGCGTGGAGCCGAATGTCCGGACCGGGGTCAGGACTGTAACCACAGGGGGCG  
CTATCACGTA CTCCACATATGGGAGATTCTTGGCCGATGGGGGATGTTCCGGAGGAGCGTA  
CGACATCATCATCTGTGATGAGTGCCACTCCACAGACCCTACGACGGTGTGGGCATTGGC  
ACGGTTCTCGACCAGGCTGAGACTGCCGGGGTTCGCCTTACTGTGCTCGCAACAGCAACGC  
CGCCGGGTTCTGTCACTGTCCCCATCCTAACATAACAGAGACAGCCCTCCCGACTACGGG  
AGAAATACCATTTTATGGAAAGGCCATCCCCCTTGAGTACATCAAAGGGGGGAAGACATCTC  
ATATTCTGTCACTCAAAGAAGAAGTGCGATGAGCTGGCCGGGAAACTGAAGTCACTCGGCT  
TAAACGCCGTCGCATTCTACAGAGGTGTCGATGTGTCCGTCATCCCCACCTCGGGCGATGT  
CGTCGTCTGCGCAACAGACGCCCTTATGACCGGCTACACAGGCGATTTTCGATTCCGTCATC  
GACTGTAACGTAGCCGTGACACAGGTGGTGGATTTTCAGCTTGGACCCAACATTTTCCATAG  
AGACTACCACCGTCCCTCAGGATGCGGTATCACGGAGCCAACGACGAGGCCGCACGGGGC  
GGGGTAAACCGGGGGTGTACAGATTTGTCTCCCAAGGGGAGAGGCCTTCGGGTATGTTCGA  
CACCGTCGTCCTGTGTGAGGCTTATGACACGGGATGCGCGTGGTACGAACTAACCCCTTCT  
GAAACAACCTGTCAGGTTGAGGGCCTATATGAACACTCCTGGCCTTCCCGTATGCCAAGACC  
ACCTGGAATTTTGGGAAGGCGTGTTTACTGGCTTGACTCACATAGACGCCCACTTTCTGTCT  
CAGACGAAGCAGGGGGGTGAGAACTTCGCGTACCTCGTGGCATAACCAGGCTACAGTGTGC  
GCCAGGGCCAAAGCCCCCCCCGCCTTCTTGGGATACGATGTGGAAGTGTCTCATCAGACTCA  
AACCCACCCTTACCGGCCCACTCCACTTTTGTATCGGCTGGGGGCGTCCAAAATGAGAT  
AATAACAACCCATCCAATAACCAAATACATCATGACCTGTATGTCTGCGGATTTGGAGGTT  
ATCACCAGCACATGGGTCCTCGTGGGTGGAGTCCTAGCCGCGCTCGCAGCCTACTGCTTGT  
CAGTGGGCTGTGTTGTCATCTGTGGCAGGATAACTTTGACTGGCAAGCCTGCTGTTGTCCCT  
GATCGCGAGATCTTATAACCAGCAATTTGACGAGATGGAGGAGTGCTCTAGGCACATCCCCT  
ACCTCGCTGAGGGCCAGCAGATCGCCGAACAGTTCAGACAAAAGGTGTTGGGACTCCTCCA

AGCGAGCGCTAAGCAGGCAGAAGAAGCTGAAGCCTGCTGTCCATTCCGCGTGGCCTAGGGT  
GGAGGAGTTTTGGAGGAAACACATGTGGAACCTTGTTCAGCGGGATTTCAGTACTTGGCGGGC  
TTATCCACTCTGCCCCGGCAACCCAGCCGTGGCATCATTGATGTCATTTACAGCGTCGCTGAC  
CAGTCCTCTGAGGACTTCTCAGACCCTGCTCCTCAACATACTCGGCGGCTGGATAGCCACC  
CAAGTGGCTCCCCCCCCCGCGTCTACAGCTTTTGTTCGTGAGCGGTCTAGCAGGAGCCACGG  
TTGGAAGCATCGGGCTCGGGAGGGTGTGGTTGATGTGCTCGCCGGATAACGGAGCCGGTGT  
GTCGGGTGCTCTAGTCGCTTTCAAGATCATGAGCGGCGAGTGCCCGACCACGGAAGACATG  
GTCAATCTGCTACCCGCGCTGTTGTCGCCAGGGGCTCTCGTGGTGGGGGTTCGTGTGTGCTGC  
CATCTTAAGACGCCACGTTGGCCCTGCTGAGGGTGCTAACCAGTGGATGAACAGGCTAATA  
GCCTTTGCATCAAGAGGCAACCACGTGTCCCCGACGCACTACGTGCCTGAGACTGACGCGT  
CAAAAAATGTGACTCAGATACTCACTTCTCTTACCATCACCAGCCTACTCCGTAGATTACAT  
CAGTGGGTCAATGAAGACACGGCCACCCCTTGCCTACCTCATGGTTACGCGACGTGTGGG  
ACTGGGTGTGTACAGTGTTATCTGATTTTAAAGTATGGCTGCAAGCCAACTTCTCCCTCGC  
CTGCCGGGGATCCCCTTCTCTCGTGCCAAACGGGATATAGGGGAGTCTGGGCAGGGGACG  
GGGTGTGCCACACCACTTGTACCTGTGGGGCCGTGATAGCTGGACACGTCAAAAATGGCAC  
CATGAAAATCACAGGGCCCAAGACATGCAGTAACACTTGGCACGGGACTTTTCCAATCAAC  
GCCACCACTACCGGCCCCAGCACACCACGACCAGCCCCCACTATCAGCGCGCTCTTTGGC  
GGGTATCTGCCGAGGACTACGTTGAGGTACGGAGGTTGGGCGACTGCCACTATGTGGTAGG  
GGTCACTGCTGAAGGGTTGAAGTGCCCTTGCCAGGTGCCTGCGCCTGAATTCTTCACTGAG  
GTCGATGGCGTGAGGATACACCGTTACGCGCCACCTTGCAAGCCCTTGCTCAGGGACGAAG  
TGACTTTCTCTGTGGGTCTTTCAAACACTATGCCATAGGGTTCGCAGCTCCCTTGCGAGCCAGAG  
CCTGACGTGACCGTAGTCACCTCAATGCTCACAGACCCACGCACATCACCGCAGAGACGG  
CAGCACGGCGGTTGAAGAGGGGGTCCCCCCCCCTCCTTAGCCAGCTCTTCGGCCATCCAGCT

GTCTGCACCGTCCCTCAAGGCTACTTGCACAACCTTCCAAAGACCACCCGGACATGGAACTC  
ATCGAGGCCAACCTCCTTTGGAGGCAGGAGATGGGAGGCAACATCACTCGAGTCGAGTCA  
GAGAACAAAGTTGTAGTACTTGACTCCTTTGAGCCTCTAACCGCTGAGTATGACGAGAGGG  
AAATCTCAGTATCAGCTGAGTGCCATAGGCCACCCAGGCACAAATTCCCTCCAGCTCTCCC  
AATATGGGCCAGGCCTGACTACAATCCACCTCTCTACAAGCATGGCAAATGCCCGGATAC  
GAGCCTCCAGTCGTGTCTGGGTGTGCCGTCGCCCCACCTAAACCGGCACCAATTCCCCCGC  
CGAGGCGGAAGAGGCTAGTGCACCTTGGATGAGTCCACGGTCTCGCACGCCTTGGCGCAGCT  
CGCCGACAAGGTATTTGTGGAGAGTAGTAGTGACCCAGGACCTAGTTCAGACTCGGGACTA  
TCAATAACCAGTCCCGTTCCACCTGCCCAACAACACCGGACGACGCCTGCTCAGAAGCAG  
AGTCCTATAGCTCAATGCCCCCTCTTGAGGGGGAGCCTGGTGACCCTGACCTAAGCTCAGG  
CTCTTGGTCCACTGTGAGCGATCAGGACGACGTCGTGTGTTGTTCCATGTCCTATTCCTGGA  
CGGGGGCTCTAATAACACCATGTGCTGCGGAGGAGGAGAAGCTTCCAATAAATCCCCTGAG  
CAACTCCCTCATAAGACACCATAACATGGTGTATTCCACCACATCACGCAGCGCCAGCCTC  
CGCCAGAAGAAGGTACATTTGACAGAGTGCAAGTGTTTCGACCAACATTATCAGGATGTAC  
TAAAGGAGATTAAGCTTCGAGCGTCCACGGTGCAGGCGAAGCTCCTATCCATAGAGGAAG  
CCTGCGACCTCACACCATCGCACTCAGCCCGGTCCAAATATGGGTATGGTGCACAGGACGT  
TAGAAGCCATGCTAGCAAGGCCGTTGACCACATCCGCTCCGTGTGGGAGGACTTGCTAGAA  
GACTCTGATACCCCAATTCCCACGACCATCATGGCTAAGAATGAAGTCTTCTGCGTAGATC  
CGTCGAAGGGTGGACGCAAGCCGGCACGCCTAATAGTTTACCCAGACTTGGGCGTGCGGGT  
CTGCGAGAAGATGGCCCTATACGACGTGACGCGGAAGTTACCACAGGCCGTGATGGGTTC  
GCATACGGATTCCAGTACTCCCCTAACCAGAGGGTTGAGTACTTGCTCAAAATGTGGCGGT  
CAAAGAAGGTGCCCATGGGCTTTTCTTACGACACCAGGTGTTTTGATTCAACCGTCACCGA  
GCGGGATATCCGGACTGAGAACGACATCTATCAGTCTTGCCAGCTGGATCCCGTGGCAAGG

AAGGCAGTATCATCCCTAACAGAACGGCTCTACGTAGGCGGCCCCATGGTAAACTCCAAGG  
GACAGTCATGTGGCTACCGTAGATGCCGCGCCAGTGGGGTGCTGCCACGAGCATGGGAA  
ACACCCTCACATGCTATCTGAAGGCACAGGCCGCCTGCAGGGCGGCCAACATCAAGGACT  
GTGACATGTTGGTGTGCGGAGATGACTTAGTGGTCATTTGTGAGAGTGCTGGCGTCCAGGA  
GGACACTGCGTCACTGCGAGCATTACGGATGCTATGACCAGGTA CT CAGCTCCCCCTGGA  
GACGCCCCGCAACCTACGTATGACCTTGAGCTCATAACATCGTGCTCATCCAATGTCTCCGT  
CGCCACGACGGCAATGGGAAGAGATATTACTACCTCACACGTGACTGTACCACTCCACTT  
GCGCGGGCCGCCTGGGAGACAGCCCGCCACACTCCAGTCAATTCGTGGTTGGGCAACATCA  
TTATGTTTGCCCCACGATATGGGTGCGTATGGTTCTGATGACCCATTTTTTCTCCATCCTCC  
AGTCGCAAGAACAATTGGAGAAAGCACTCGACTTTGACATCTACGGAGTGACCTATTCCGT  
CTCTCCACTTGATCTCCCAGCAATCATTCAACGACTCCATGGCATGGCAGCATTITCACTCC  
ACGGATACTCTCCAGTTGAGCTCAATAGGGTAGGGGCTTGCCTCAGGAAACTTGGGGTACC  
TCCCTTGCGAGCCTGGAGACATCGAGCCAGAGCTGTCAGAGCCAAACTCATTGCCCAAGGG  
GGGAAAGCGGCTATATGCGGTAAGTACCTCTTCAACTGGGCGGTGAAGACCAAATAAAA  
CTCACTCCATTGGTCTCCGCGAGCAAGCTTGACTTATCAGGCTGGTTCGTGGCAGGCTACGA  
CGGGGGGGACATTTATCACAGCGTGTCCCAGGCTCGACCCCGTCTCTTACTCCTTGGCCTAC  
TCCTACTCACCGTAGGGGTAGGCATCTTTTTGCTCCCCGCTCGGTAG

**FIG S1.** Nucleotide sequences of the pGT6a-cons replicon. A plasmid (pGT6a-cons) encoding a subgenomic Hepatitis C virus (HCV) genotype (GT)-6a replicon was constructed for phenotypic analysis following the method described by Yu et al (1) with a few modifications. Briefly, A subgenomic GT-6a consensus (GT-6a-cons) sequence was calculated by comparing 21 GT-6a genome sequences available in the usHCVdb (Table S2) and synthesized (Integrated DNA Technologies,

Coralville, IA). The synthesized GT-6a-cons 5'-untranslated region (5'-UTR) plus the first 48 nucleotides of the core region and the NS3-NS5B polyprotein region (including the sequence encoding the NS5A amino acid substitution S232I) were cloned into the Con1 replicon (2) to replace the GT-1b 5-UTR and NS3-NS5B sequences using the regular cloning technology.

**TABLE S1.** HCV GT-6 NS3, NS5A and NS5B primers to amplify and sequence patient-derived NS3, NS5A and NS5B coding regions

| Name<br>(NS3-) | NS3 Sequence               | Name<br>(NS5A-) | NS5A Sequence               | Name<br>(NS5B-) | NS5B Sequence               |
|----------------|----------------------------|-----------------|-----------------------------|-----------------|-----------------------------|
| 6a-F           | TTCTCYCCCATGGA<br>GAAGAA   | 6a-F1           | TCACCAGCCTACT<br>CCGTAGA    | 6a-F1           | GGGAGCCTGGTGACC<br>CTGACCT  |
| 6a-R1          | TTCCCATAYGTGGA<br>GTACGT   | 6a-F2           | GTGGGTCAATGAA<br>GACACG     | 6a-F2           | TCTTGGTCCACTGTG<br>AGCGGTG  |
| 6a-R2          | CGGGTGCTCTTTCC<br>RCTGCC   | 6a-R1           | TAGCAAGTCCTCC<br>CACACGGAG  | 6a-R1           | CAAAAAGATGCCTAC<br>CCCTAC   |
| 6e-F           | TTCTCGCCTATGGA<br>GAAGAA   | 6a-R2           | GGACGCTCGAAGC<br>TTGATCTCC  | 6a-R2           | AGTAGGAGTAGGCC<br>AAGGAGTAA |
| 6e-R1          | TTTCCATAGGTAGA<br>RTAGGT   | 6e-F1           | TTTAAGATCATGA<br>GCGGCGA    | 6e-F1           | GAGCCCGGAGACCCC<br>GACTTAAG |
| 6e-R2          | TTCGTGCTTTTCCC<br>RCTGCC   | 6e-F2           | TGGATGAAYAGGC<br>TCATAGC    | 6e-F2           | GGCATCGTGGTCCAC<br>AGTCAGC  |
| 6f-F           | GCCCCATAACAGC<br>CTACCATC  | 6e-R1           | CGCCCTCTTCTCGC<br>ACACCC    | 6e-R1           | AAGGAAGATGCCTAC<br>CCCTAC   |
| 6f-R           | TGATCTCATAGTGG<br>TCTCCATG | 6e-R2           | TGTCCACACAAAA<br>CACCTCA    | 6elrs-R2        | AGTAGGAGTAGGCA<br>CAGGAGTAA |
| 6g-F           | GCACCAATCACGG<br>CCTACGCC  | 6f-F1           | CTTCGGAGACTCC<br>ACGAGTGGAT | 6f-F1           | CATGGTCTACGGTCA<br>GTGATG   |
| 6g-R           | GGACCGCATRGTY<br>GTCTCCATG | 6f-F2           | CAACGGAGATTGG<br>ACAACCTCCA | 6f-F2           | TGAGGATGACGCAA<br>ACAGCAG   |

| Name<br>(NS3-) | NS3 Sequence                | Name<br>(NS5A-) | NS5A Sequence              | Name<br>(NS5B-) | NS5B Sequence                  |
|----------------|-----------------------------|-----------------|----------------------------|-----------------|--------------------------------|
| 6l-F1          | TTCTCCCCTATGGA<br>GAAGAA    | 6f-R1           | TCTACGCGCTGCT<br>TAGGCGAG  | 6f-R            | GAGCAGGAAGCAGA<br>AAGATGCC     |
| 6l-F2          | TTCTCCCCTATGGA<br>GACCAA    | 6f-R2           | AGGCGAGTACTGG<br>AAGCCGTA  | 6g-F            | ATGTCCTACTCATGG<br>ACGGGAGCCCT |
| 6l-R1          | TTGCCATAGGTAGA<br>ATAGGT    | 6g-F            | ACATGGCTYCGAG<br>ACATCTGG  | 6g-R            | GGGCGGGGAGCAAA<br>AAGATGCCTACC |
| 6l-R2          | TTAGTGCTCTTGCC<br>ACTGCC    | 6g-R            | TCCYAGAGCTGA<br>CTGTGGACC  | 6l-F1           | GGAGATCCGGACCTT<br>AGCTCGG     |
| 6o-F1          | TTCTCCCCTATGGA<br>GAAGAA    | 6l-1R           | GGCCCTCTTCTCG<br>CACACCC   | 6l-F2           | CCACAGTCAGTGAGG<br>AGGACGA     |
| 6o-F2          | GCYGCTTGCGGCG<br>ACATACTT   | 6l-F1           | TTCGAGGGGTAAT<br>CATGTATCG | 6l-R1           | GGGCAGGGAGCAGA<br>AAGATGCC     |
| 6o-R1          | TTGCCATAGGTGGA<br>ATATGT    | 6l-F2           | ACGTGCCTGAAAC<br>TGACACTTC | 6o-F1           | AACCCGGGGATCCGG<br>ACTTGGA     |
| 6o-R2          | TTCGTGCTCTTTCC<br>RCTGCCAGT | 6l-R2           | TATCGACGCAAAA<br>CACCTCA   | 6o-F2           | CGGGATCCTGGTCCA<br>CGGTCAG     |
| 6p-F           | GCCCCATTACGGC<br>CTACCACC   | 6o-F1           | AAAAATGTGATGA<br>CCATACT   | 6o-R1           | AGCAAAAAGATGCCT<br>ACCC        |
| 6p-R           | AGACCGCATGGTA<br>GTCTCCATG  | 6o-F2           | TGATGACCATACT<br>CAGTTCC   | 6o-R2           | GAGTAGGAGTAGGC<br>ACAGGAGT     |
| 6q-F           | TTCTCTCCTATGGA<br>GAAGAA    | 6o-R1           | TCCACCCGCTGCT<br>TAGGCGAG  | 6p-F1           | ATGTCGTA CTCTGG<br>ACTGGGGCTCT |
| 6q-R1          | TTCCCATAGGTGGA<br>GTATGT    | 6o-R2           | AGGCGAGTACTGG<br>AAGCCATA  | 6p-R1           | GAGCGGGAAGCAAA<br>AAGATGCC     |

| Name<br>(NS3-) | NS3 Sequence              | Name<br>(NS5A-) | NS5A Sequence              | Name<br>(NS5B-) | NS5B Sequence               |
|----------------|---------------------------|-----------------|----------------------------|-----------------|-----------------------------|
| 6q-R2          | CTTGGTGCTCTTAC<br>CACTGCC | 6p-F            | ACTTGGTTAAGAG<br>ACATTTGG  | 6q-F1           | CCTGAGCTCTGGCTC<br>GTGGTC   |
| 6r-F           | TTCTCACCCATGGA<br>GAAGAA  | 6p-R            | TCCTCCTCGCTGA<br>CCGTCGACC | 6q-F2           | TGGTCTACAGTCAGT<br>GAGGA    |
| 6r-R1          | TTGCCATATGTGGA<br>ATAGGT  | 6q-F1           | TTCAARATCATGA<br>GCGGGGA   | 6q-R1           | CAAAAAGATCCCTAC<br>CCCTAC   |
| 6r-R2          | CTTGGTGCTCTTAC<br>CGCTGCC | 6q-F2           | GGGCCAACCAGTG<br>GATGAAC   | 6q-R2           | AGTAGGAGTAGGAA<br>CAGGAGGAA |
| 6s-F           | TTCTCGCCTATGGA<br>GAAGAA  | 6q-R1           | GGCTTTCTTCTCGC<br>ATACCC   | 6r-F1           | ACCACTCGAGGGCGA<br>ACCTG    |
| 6s-R1          | TTGCCATAGGTAGA<br>GTATGT  | 6q-R2           | GGTCTACGCAAAA<br>CACCTCA   | 6r-F2           | TTGGTCCACGGTCAG<br>TGACGA   |
| 6s-R2          | TTTAGTACTCTTCC<br>CGCTACC | 6r-R1           | TGCTCGCTTCTCGC<br>ATACCC   | 6r-R1           | CAGGAAAATGCCTAC<br>CCCTAC   |
|                |                           | 6r-R2           | CGTCCACACAGAA<br>CACCTCA   | 6s-F1           | GTGATCCCGACCTCG<br>ATTCGG   |
|                |                           | 6r-F1           | GCTTTCAAGATCA<br>TGAGCGG   | 6s-F2           | TGGGCTACCGTCAGT<br>GAAGA    |
|                |                           | 6r-F2           | CACGCACTATGTG<br>CCTGAGAC  | 6s-R1           | CAAGATGACGCCTAC<br>CCCTAC   |
|                |                           | 6s-F1           | GCGTTCAAGATCA<br>TGAGCGG   |                 |                             |
|                |                           | 6s-F2           | GGGGCCAACCAGT<br>GGATGAA   |                 |                             |

| Name<br>(NS3-) | NS3 Sequence | Name<br>(NS5A-) | NS5A Sequence            | Name<br>(NS5B-) | NS5B Sequence |
|----------------|--------------|-----------------|--------------------------|-----------------|---------------|
|                |              | 6s-R1           | TGCCCTTTTCTCGC<br>ACACCC |                 |               |
|                |              | 6s-R2           | GCTCTACACAGAA<br>CACCTCA |                 |               |

F, forward primer; GT, genotype; R, reverse primer

**TABLE S2.** USHCVDB HCV GT-6 sequences used in baseline polymorphism analyses

| Accession  |    |           | Accession |    |               | Accession |    |               |
|------------|----|-----------|-----------|----|---------------|-----------|----|---------------|
| Number     | GT | Country   | Number    | GT | Country       | Number    | GT | Country       |
| AY859526*# | 6a | Hong Kong | D84263*   | 6d | Vietnam       | JX183555* | 6l | Vietnam       |
| DQ859971   | 6a | China     | DQ314805* | 6e | China         | JX183556* | 6l | Vietnam       |
| HQ639936*# | 6a | China     | EU408326* | 6e | United States | DQ835767* | 6m | Thailand      |
| KC441486   | 6a | China     | EU246931* | 6e | Vietnam       | DQ835765* | 6m | Thailand      |
| KC441485   | 6a | China     | EU246932* | 6e | Vietnam       | DQ835766* | 6m | Thailand      |
| HQ912955*# | 6a | China     | DQ835760* | 6f | Thailand      | DQ835763* | 6m | Thailand      |
| HQ912954*# | 6a | China     | DQ835764* | 6f | Thailand      | AY878652* | 6n | China         |
| KC844037*# | 6a | China     | EU246936* | 6f | Thailand      | DQ278894* | 6n | China         |
| KC441480   | 6a | China     | HM042087  | 6f | Thailand      | DQ835768* | 6n | Thailand      |
| KC441481   | 6a | China     | HM042085  | 6f | Thailand      | EU246937* | 6n | Thailand      |
| KC441482   | 6a | China     | HM042086  | 6f | Thailand      | EU246938* | 6n | Thailand      |
| KC441483   | 6a | China     | HM042088  | 6f | Thailand      | KC191671* | 6n | Malaysia      |
| KC441484   | 6a | China     | HM042090  | 6f | Thailand      | EF424627* | 6o | Canada        |
| KC441477   | 6a | China     | HM042089  | 6f | Thailand      | EU408327* | 6o | United States |

| Accession  |    |              | Accession |    |              | Accession |       |         |
|------------|----|--------------|-----------|----|--------------|-----------|-------|---------|
| Number     | GT | Country      | Number    | GT | Country      | Number    | GT    | Country |
| KC441478   | 6a | China        | HM042093  | 6f | Thailand     | EU246934* | 6o    | Vietnam |
| KC441479   | 6a | China        | HM042091  | 6f | Thailand     | EF424626* | 6p    | Canada  |
| KC844038*# | 6a | China        | HM042092  | 6f | Thailand     | DQ155560* | 6p/2i | Vietnam |
| DQ480513*# | 6a | Hong<br>Kong | HM042094  | 6f | Thailand     | EF424625* | 6q    | Canada  |
| DQ480516*# | 6a | Hong<br>Kong | HM042095  | 6f | Thailand     | EU408328* | 6r    | Canada  |
| DQ480523*# | 6a | Hong<br>Kong | HM042096  | 6f | Thailand     | EU408329* | 6s    | Canada  |
| DQ480514*# | 6a | Hong<br>Kong | DQ314806* | 6g | Hong<br>Kong | EU246939* | 6t    | Vietnam |
| DQ480515*# | 6a | Hong<br>Kong | D63822*   | 6g | Indonesia    | EF632069* | 6t    | Vietnam |
| DQ480518*# | 6a | Hong<br>Kong | D84265*   | 6h | Vietnam      | EF632070* | 6t    | Vietnam |
| DQ480519*# | 6a | Hong<br>Kong | DQ835762* | 6i | Thailand     | EF632071* | 6t    | Vietnam |
| DQ480520*# | 6a | Hong<br>Kong | EU246935* | 6i | Thailand     | EU408331* | 6u    | China   |

| Accession  |    |           | Accession |    |               | Accession |     |         |
|------------|----|-----------|-----------|----|---------------|-----------|-----|---------|
| Number     | GT | Country   | Number    | GT | Country       | Number    | GT  | Country |
| DQ480521*# | 6a | Hong Kong | DQ835770* | 6i | Thailand      | EU246940* | 6u  | Vietnam |
| DQ480522*# | 6a | Hong Kong | DQ835761* | 6j | Thailand      | EU798761* | 6v  | China   |
| DQ480517*# | 6a | Hong Kong | DQ835769* | 6j | Thailand      | FJ435090* | 6v  | China   |
| DQ480524*# | 6a | Hong Kong | AY878651* | 6k | China         | EU798760* | 6v  | China   |
| DQ480512*# | 6a | Hong Kong | DQ278893  | 6k | China         | EU158186* | 6v  | China   |
| Y12083*#   | 6a | Hong Kong | AY878650* | 6k | China         | EU643834* | 6w  | Taiwan  |
| EU246930*# | 6a | Vietnam   | DQ278891  | 6k | China         | EU643836* | 6w  | Taiwan  |
| NC 009827* | 6b | Thailand  | D84264*   | 6k | Vietnam       | DQ278892* | 6w  | China   |
| D84262*    | 6b | Thailand  | EF424628* | 6l | United States | EU408330* | 6xa | China   |
| EF424629*  | 6c | Thailand  | EU246933* | 6l | Vietnam       | EU408332* | 6xa | China   |

GT, genotype

\* Sequences used in the NS3 and NS5B polymorphism analyses

# Sequences used to calculate the GT-6a subgenomic consensus sequence

**TABLE S3.** Source and HCV GT-6 subtypes of patient-derived samples

| Patient<br>Sample<br>Identification | Source                    | Country | Segregation to<br>usHCVdb<br>Sequences | HCV GT-6 Subtypes |      |      |
|-------------------------------------|---------------------------|---------|----------------------------------------|-------------------|------|------|
|                                     |                           |         |                                        | NS3               | NS5A | NS5B |
| BMS-1                               | Monash Univ (10MMC)       | AU      |                                        | a                 | a    | a    |
| BMS-2                               | Boca Biolistics (11Boca)  | ND      | AY859526,                              | a                 | a    | a    |
| BMS-3                               | Boca Biolistics (22Boca)  | ND      | Y12083                                 | a                 | a    | a    |
| BMS-4                               | SeraCare Life Sci (6a-16) | ND      |                                        | NA                | a    | NA   |
| BMS-5                               | ALLY-1 (AI444215) (3)     | US      |                                        | e                 | e    | e    |
| BMS-6                               | Monash Univ (5MMC)        | AU      |                                        | e                 | e    | e    |
| BMS-7                               | Monash Univ (8MMC)        | AU      |                                        | e                 | e    | e    |
| BMS-8                               | Boca Biolistics (12Boca)  | ND      | DQ314805                               | e                 | e    | e    |
| BMS-9                               | Boca Biolistics (14Boca)  | ND      |                                        | e                 | e    | e    |
| BMS-10                              | Boca Biolistics (15Boca)  | ND      |                                        | e                 | e    | e    |
| BMS-11                              | Boca Biolistics (18Boca)  | ND      | DQ835760                               | f                 | f    | f    |
| BMS-12                              | UNITY-4 (AI443123-1) (4)  | TW      |                                        | g                 | g    | g    |
| BMS-13                              | UNITY-4 (AI443123-2) (4)  | TW      |                                        | g                 | g    | g    |
| BMS-14                              | UNITY-4 (AI443123-3) (4)  | TW      | D63822                                 | g                 | g    | g    |
| BMS-15                              | UNITY-4 (AI443123-4) (4)  | TW      |                                        | g                 | g    | g    |

| Patient<br>Sample<br>Identification | Source                   | Country | Segregation to<br>usHCVdb<br>Sequences | HCV GT-6 Subtypes |      |      |
|-------------------------------------|--------------------------|---------|----------------------------------------|-------------------|------|------|
|                                     |                          |         |                                        | NS3               | NS5A | NS5B |
| BMS-16                              | Monash Univ (1MMC)       | AU      |                                        | l                 | l    | l    |
| BMS-17                              | Boca Biolistics (13Boca) | ND      | EF424628                               | l                 | l    | l    |
| BMS-18                              | Boca Biolistics (21Boca) | ND      |                                        | l                 | l    | l    |
| BMS-19                              | Boca Biolistics (20Boca) | ND      | EF424627                               | o                 | o    | o    |
| BMS-20                              | UNITY-2 (AI443113) (5)   | US      | EF424626                               | p                 | p    | p    |
| BMS-21                              | Monash Univ (3MMC)       | AU      | EF424625                               | q                 | q    | q    |
| BMS-22                              | Monash Univ (4 MMC)      | AU      | EU408328                               | r                 | r    | r    |
| BMS-23                              | Monash Univ (2MMC)       | AU      |                                        | s                 | s    | s    |
| BMS-24                              | Monash Univ (6 MMC)      | AU      | EU408329                               | s                 | s    | s    |
| BMS-25                              | Monash Univ (7MMC)       | AU      |                                        | s                 | s    | s    |

AU, Australia; BMS, Bristol-Myers Squibb; NA, not available; ND, not determined; Sci, Sciences; TW, Taiwan;  
US, United States; Univ, university

**TABLE S4.** Prevalence of HCV GT-6 subtypes by NS3 polymorphisms and country

| GT-6 Subtype | NS3 Seqs | Country                      | NS3 Seqs with Noted Polymorphisms | NS3 Polymorphisms |     |      |      |      |
|--------------|----------|------------------------------|-----------------------------------|-------------------|-----|------|------|------|
|              |          |                              |                                   | V36               | K80 | A156 | D168 | I170 |
| 6a           | 24       | AU (n=1), CN                 | 20                                |                   |     |      |      |      |
|              |          | (n=5), HK (n=15),            | 1                                 |                   |     |      | E    |      |
|              |          | VN (n=1), ND (n=2)           | 1                                 |                   |     |      |      | V    |
|              |          |                              | 1                                 |                   |     | L    |      |      |
|              |          |                              | 1                                 |                   |     |      | Q    |      |
| 6b           | 2        | TH                           | 2                                 |                   | Q   |      |      |      |
| 6c           | 1        | TH                           | 1                                 |                   | Q   |      | V    |      |
| 6d           | 1        | VN                           | 1                                 | L                 | Q   |      | V    |      |
| 6e           | 10       | AU (n=2), CN                 | 10                                | I                 | Q   |      |      | V    |
|              |          | (n=10), US                   |                                   |                   |     |      |      |      |
|              |          | (n=2), VN (n=2),<br>ND (n=3) |                                   |                   |     |      |      |      |
| 6f           | 4        | TH (n=3), ND (n=1)           | 4                                 | L                 | Q   |      |      | V    |

| GT-6<br>Subtype | NS3<br>Seqs | Country                                  | NS3 Seqs                    | NS3 Polymorphisms |     |      |      |      |
|-----------------|-------------|------------------------------------------|-----------------------------|-------------------|-----|------|------|------|
|                 |             |                                          | with Noted<br>Polymorphisms | V36               | K80 | A156 | D168 | I170 |
| 6g              | 6           | HK (n=1), ID                             | 4                           |                   | Q   |      |      |      |
|                 |             | (n=1),TW (n=4)                           | 1                           | L                 | Q   |      |      | V    |
|                 |             |                                          | 1                           | L                 | Q   |      | E    | V    |
| 6h              | 1           | VN                                       | 1                           |                   | Q   |      |      | A    |
| 6i              | 3           | TH                                       | 3                           |                   | Q   |      |      | V    |
| 6j              | 2           | TH                                       | 2                           |                   | Q   |      |      | V    |
| 6k              | 3           | CN (n=2), VN (n=1)                       | 3                           |                   | Q   |      |      | V    |
| 6l              | 7           | AU (n=1), US (n=1),                      | 5                           |                   | Q   |      |      | V    |
|                 |             | VN (n=3), ND (n=3)                       | 1                           | L                 | Q   |      |      | V    |
|                 |             |                                          | 1                           |                   | Q   | V    |      | V    |
| 6m              | 4           | TH                                       | 4                           |                   | Q   |      |      |      |
| 6n              | 6           | CN (n=2), MY                             | 6                           |                   | Q   |      |      | V    |
|                 |             | (n=1), TH (n=3)                          |                             |                   |     |      |      |      |
| 6o              | 4           | CA (n=1), US (n=1),<br>VN (n=1),ND (n=1) | 4                           | I                 | Q   |      |      | V    |

| GT-6<br>Subtype | NS3<br>Seqs | Country                         | NS3 Seqs<br>with Noted<br>Polymorphisms | NS3 Polymorphisms |     |      |      |      |
|-----------------|-------------|---------------------------------|-----------------------------------------|-------------------|-----|------|------|------|
|                 |             |                                 |                                         | V36               | K80 | A156 | D168 | I170 |
| 6p              | 3           | CA (n=1), US (n=1),<br>VN (n=1) | 3                                       |                   | Q   |      |      | V    |
| 6q              | 2           | AU (n=1), CA (n=1)              | 1                                       | I                 | Q   |      |      | V    |
|                 |             |                                 | 1                                       | L                 | Q   |      |      | V    |
| 6r              | 2           | AU (n=1), CA (n=1)              | 2                                       |                   | Q   |      |      | V    |
| 6s              | 4           | AU (n=3), CA (n=1)              | 4                                       | L                 | Q   |      |      | V    |
| 6t              | 4           | VN                              | 4                                       | L                 | Q   |      |      | V    |
| 6u              | 2           | CN (n=1), VN (n=1)              | 2                                       |                   | Q   |      |      | V    |
| 6v              | 4           | CN                              | 4                                       |                   | Q   |      |      | V    |
| 6w              | 3           | CN (n=1), TW (n=2)              | 3                                       | L                 | Q   |      |      | V    |
| 6xa             | 2           | CN                              | 2                                       |                   | Q   |      |      | V    |

No., number; Seqs, sequences

Country codes: AU: Australia; CA: Canada; CN: Mainland China; HK: Hong Kong; ID: Indonesia; MY: Malasia;  
 ND: Not Determined; TH: Thailand; TW: Taiwan; US: United States; VN: Vietnam

**TABLE S5.** Susceptibility of HCV GT-6 NS3 polymorphisms at residue positions associated with NS3 drug resistance

|                         | <b>ASV</b>       |                  | <b>SMV#</b>      |                  | <b>GZV#</b>      |                  | <b>BMS-986144*</b> |                  |
|-------------------------|------------------|------------------|------------------|------------------|------------------|------------------|--------------------|------------------|
|                         | EC <sub>50</sub> | EC <sub>90</sub> | EC <sub>50</sub> | EC <sub>90</sub> | EC <sub>50</sub> | EC <sub>90</sub> | EC <sub>50</sub>   | EC <sub>90</sub> |
|                         | (±SD)              | (±SD)            |
| <b>RAS</b>              | nM                 | nM               |
| WT-cons                 | 48 (5.5)         | 130 (27)         | 54 (6.2)         | 96 (16)          | 3.6 (0.4)        | 8.1 (0.9)        | 9.0 (1.1)          | 15 (2)           |
| D168E                   | 300 (16)         | 513 (38)         | 1355 (95)        | 1583 (79)        | 19 (1.2)         | 22 (0.1)         | 18 (1.2)           | 21 (1.6)         |
| K80Q                    | 7.1 (0.2)        | 18 (0.2)         | 3.5 (0.1)        | 6.4 (0.1)        | 1.1 (0.2)        | 2.2 (0.1)        | 3.9 (0.0)          | 7.5 (0.1)        |
| K80Q-<br>D168E          | 296 (4)          | 672 (28)         | 95 (0.6)         | 194 (0.5)        | 6.7 (0.6)        | 20 (1.1)         | 9.1 (0.4)          | 17 (0.1)         |
| K80Q-<br>I170A          | 13 (1.1)         | 29 (0.2)         | 6.5 (0.5)        | 13 (2.2)         | 1.6 (0.3)        | 3.3 (0.6)        | 4.7 (0.4)          | 8.8 (0.1)        |
| V36L-<br>K80Q-<br>D168E | 168 (11)         | 347 (35)         | 71 (1.5)         | 167 (19)         | 4 (0.1)          | 12 (1)           | 8.5 (0.5)          | 16 (0.5)         |

ASV, asunaprevir; GZV, rgazoprevir; SMV, simeprevir; WT-cons, wild-type consensus sequence for GT-6a

\* BMS-986144 is a pan-genotypic NS3 protease P1-P3 macrocycle (6)

# Clinical resistance profiles for simeprevir (SMV) and grazoprevir (GZV) are described in FDA-approved product labels (7, 8)

NS3-K80L resulted in similar  $EC_{50/90}$  values as K80Q; No replication data was available for A156V

NS3 substitutions were introduced into the HCV GT-6a NS3-NS5B consensus sequence. Experiments with the different NS3 inhibitors were tested in parallel and results represent the average of three independent experiments each performed in duplicate. When testing HCV GT-6a replicon variants, susceptibility assays using the HCV GT-6a-cons was performed in parallel.

**TABLE S6.** Prevalence of HCV GT-6 subtypes by NS5B polymorphisms and country

| GT-6<br>Subtype | NS5B<br>Seqs | Country               | NS5B Seqs<br>with Noted<br>Polymorphs | NS5B Polymorphisms |      |      |      |      |      |
|-----------------|--------------|-----------------------|---------------------------------------|--------------------|------|------|------|------|------|
|                 |              |                       |                                       | L159               | S282 | L392 | V421 | V494 | P495 |
| 6a              | 24           | AU (n=1), CN (n=5),   | 19                                    |                    |      |      |      |      |      |
|                 |              | HK (n=15), VN         | 4                                     |                    |      |      | A    |      |      |
|                 |              | (n=1), ND (n=2)       | 1                                     |                    |      |      |      | L    |      |
| 6b              | 2            | TH                    | 2                                     |                    |      |      |      | A    |      |
| 6c              | 1            | TH                    | 1                                     |                    |      |      |      | A    |      |
| 6d              | 1            | VN                    | 1                                     |                    |      |      |      | A    |      |
| 6e              | 10           | AU (n=2), CN          | 6                                     |                    |      |      |      | A    |      |
|                 |              | (n=10), US (n=2),     | 4                                     |                    |      | I    | A    |      |      |
|                 |              | VN (n=2),<br>ND (n=3) |                                       |                    |      |      |      |      |      |
| 6f              | 4            | TH (n=3), ND (n=1)    | 4                                     |                    |      |      |      | A    |      |
| 6g              | 6            | HK (n=1), ID (n=1),   | 2                                     |                    |      |      |      | A    |      |
|                 |              | TW (n=4)              | 3                                     |                    |      | I    |      |      |      |
|                 |              |                       | 1                                     |                    |      |      | A    |      |      |

| GT-6<br>Subtype | NS5B<br>Seqs | Country                                   | NS5B Seqs                | NS5B Polymorphisms |      |      |      |      |        |
|-----------------|--------------|-------------------------------------------|--------------------------|--------------------|------|------|------|------|--------|
|                 |              |                                           | with Noted<br>Polymorphs | L159               | S282 | L392 | V421 | V494 | P495   |
| 6h              | 1            | VN                                        | 1                        |                    |      |      |      |      | A      |
| 6i              | 3            | TH                                        | 3                        |                    |      |      |      |      | A      |
| 6j              | 2            | TH                                        | 2                        |                    |      |      |      |      | A      |
| 6k              | 3            | CN (n=2), VN (n=1)                        | 3                        |                    |      |      |      |      | A      |
| 6l              | 7            | AU (n=1), US (n=1),<br>VN (n=3), ND (n=3) | 7                        |                    |      |      |      |      | A      |
| 6m              | 4            | TH                                        | 4                        |                    |      |      |      |      | A      |
| 6n              | 6            | CN (n=2), MY (n=1),<br>TH (n=3)           | 6                        |                    |      |      |      |      | A      |
| 6o              | 4            | CA (n=1), US (n=1),<br>VN (n=1), ND (n=1) | 3<br>1                   |                    |      |      |      | ?    | A<br>A |
| 6p              | 3            | CA (n=1), US (n=1),<br>VN (n=1)           | 3                        |                    |      |      |      |      | A      |
| 6q              | 2            | AU (n=1), CA (n=1)                        | 1<br>1                   |                    |      |      | I    |      | A<br>A |

| GT-6<br>Subtype | NS5B<br>Seqs | Country            | NS5B Seqs<br>with Noted<br>Polymorphs | NS5B Polymorphisms |      |      |      |      |      |
|-----------------|--------------|--------------------|---------------------------------------|--------------------|------|------|------|------|------|
|                 |              |                    |                                       | L159               | S282 | L392 | V421 | V494 | P495 |
| 6r              | 2            | AU (n=1), CA (n=1) | 2                                     |                    |      |      |      | A    |      |
| 6s              | 4            | AU (n=3), CA (n=1) | 1                                     |                    |      |      |      | A    |      |
|                 |              |                    | 3                                     | F                  |      |      |      | A    |      |
| 6t              | 4            | VN                 | 4                                     |                    |      |      |      | A    |      |
| 6u              | 4            | CN (n=3), VN (n=1) | 4                                     |                    |      |      |      | A    |      |
| 6v              | 4            | CN                 | 4                                     |                    |      |      |      | A    |      |
| 6w              | 3            | CN (n=1), TW (n=2) | 1                                     |                    |      |      |      |      |      |
|                 |              |                    | 1                                     |                    |      |      |      | M    |      |
|                 |              |                    | 1                                     | C                  |      |      | M    |      |      |

No., number; Polymorphs, polymorphisms; Seqs, sequences

Country codes: AU: Australia; CA: Canada; CN: Mainland China; HK: Hong Kong; ID: Indonesia; MY: Malasia; ND: Not Determined; TH: Thailand; TW: Taiwan; US: United States; VN: Vietnam

**TABLE S7.** Susceptibility of HCV GT-6 NS5B polymorphisms at residue positions associated with NS5B drug resistance

|            | <b>BCV</b>                 |                        | <b>SOF</b>                    |                        | <b>BMS-929075</b>        |                        |
|------------|----------------------------|------------------------|-------------------------------|------------------------|--------------------------|------------------------|
|            | <b>(Thumb-1 Inhibitor)</b> |                        | <b>(Nucleotide Inhibitor)</b> |                        | <b>(Palm Inhibitor)*</b> |                        |
|            | EC <sub>50</sub> (±SD)     | EC <sub>90</sub> (±SD) | EC <sub>50</sub> (±SD)        | EC <sub>90</sub> (±SD) | EC <sub>50</sub> (±SD)   | EC <sub>90</sub> (±SD) |
| <b>RAS</b> | nM                         | nM                     | nM                            | nM                     | nM                       | nM                     |
| WT-cons    | 64 (8)                     | 312 (13)               | 60 (24)                       | 266 (30)               | 13 (2)                   | 71 (8)                 |
| V494A      | 495 (132)                  | 2654 (234)             | 68 (5)                        | 315 (11)               | 15 (2)                   | 70 (2)                 |
| P495L      | >5000                      | >5000                  | 86 (6)                        | 421 (37)               | 7.2 (0.3)                | 39 (5)                 |
| L392I      | 664 (69)                   | 2723 (94)              | 80 (6)                        | 338 (20)               | 14 (0)                   | 61 (8)                 |

BCV, beclabuvir; SOF, sofosbuvir; WT-cons, wild-type consensus sequence for GT-6a

BCV is a thumb Site I inhibitor, sofosbuvir SOF is a nucleoside inhibitor while BMS-929075 is a primer grip inhibitor usually impacted by substitutions at C316, S365 and M414 (9)

NS5B substitutions were introduced into the HCV GT-6a NS3-NS5B consensus sequence. No replication data was available for -L392I+V494A. Experiments with the different NS5B inhibitors were tested in parallel and results represent the average of three independent experiments each performed in duplicate. When testing HCV GT-6a replicon variants, susceptibility assays using the HCV GT-6a-cons was performed in parallel.

## REFERENCES

1. Yu M, Peng B, Chan K, Gong R, Yang H, Delaney Wt, Cheng G. 2014. Robust and persistent replication of the genotype 6a hepatitis C virus replicon in cell culture. *Antimicrob Agents Chemother* 58:2638-2646.
2. Fridell RA, Qiu D, Wang C, Valera L, Gao M. 2010. Resistance analysis of the hepatitis C virus NS5A inhibitor BMS-790052 in an in vitro replicon system. *Antimicrob Agents Chemother* 54:3641-3650.
3. Poordad F, Schiff ER, Vierling JM, Landis C, Fontana RJ, Yang R, McPhee F, Hughes EA, Noviello S, Swenson ES. 2016. Daclatasvir with sofosbuvir and ribavirin for hepatitis C virus infection with advanced cirrhosis or post-liver transplantation recurrence. *Hepatology* 63:1493-1505.
4. Kao JH, Yu ML, Peng CY, Heo J, Chu CJ, Chang TT, Lee YJ, Hu TH, Yoon KT, Paik SW, Lim YS, Ahn SH, Isakov V, McPhee F, Hu W, Scott Swenson E, Yin PD, Treitel M. 2017. Daclatasvir/asunaprevir/beclabuvir, all-oral, fixed-dose combination for patients with chronic hepatitis C virus genotype 1. *J Gastroenterol Hepatol* 32:1998-2005.
5. Wyles DL, Ruane PJ, Sulkowski MS, Dieterich D, Luetkemeyer A, Morgan TR, Sherman KE, Dretler R, Fishbein D, Gathe JC, Jr., Henn S, Hineostroza F, Huynh C, McDonald C, Mills A, Overton ET, Ramgopal M, Rashbaum B, Ray G, Scarsella A, Yozviak J, McPhee F, Liu Z, Hughes E, Yin PD, Noviello S, Ackerman P. 2015. Daclatasvir plus Sofosbuvir for HCV in Patients Coinfected with HIV-1. *N Engl J Med* 373:714-725.
6. Scola PM, Sun L-Q, Gillis EP, Bowsher, MS, Chen J, Wang X et al. 2015. Discovery of a second generation, pan genotype NS3/4A protease inhibitor (BMS-986144) for the treatment of hepatitis

C. From Abstracts of Papers, 250th ACS National Meeting & Exposition, Boston, MA, United States, MEDI-309.

7. Olysio (Simeprevir) capsules, for oral use 2013:  
[https://www.accessdata.fda.gov/drugsatfda\\_docs/label/2013/205123s001lbl.pdf](https://www.accessdata.fda.gov/drugsatfda_docs/label/2013/205123s001lbl.pdf)
8. Zepatier™ (elbasvir and grazoprevir) tablets label 2016:  
[https://www.accessdata.fda.gov/drugsatfda\\_docs/label/2017/208261s002lbl.pdf](https://www.accessdata.fda.gov/drugsatfda_docs/label/2017/208261s002lbl.pdf)
9. Yeung KS, Beno BR, Parcella K, Bender JA, Grant-Young KA, Nickel A, et al. 2017. Improving Metabolic Stability with Deuterium: The Discovery of BMT-052, a Pan-genotypic HCV NS5B Polymerase Inhibitor. ACS Med Chem Lett 8:771-774.
